# Supplementary material for: Duration of effectiveness of the COVID-19 vaccine in Japan: A retrospective cohort study using large- scale population-based registry data
Source: Research Square preprint supplement (doi:10.21203/rs.3.rs-4023571/v1), 2024-03-19
Supplement: Supplementary file 1 [file 55465e59cec59f8dc01ff7cc.docx]

**Supplemental Table 1.** Time-dependent effectiveness of the COVID-19 vaccine against the incidence of COVID-19 based on time-dependent piecewise univariable Cox regression analysis

|  |  | Hazard ratio | 95% confidence interval | | | | | P-value |
| --- | --- | --- | --- | --- | --- | --- | --- | --- |
| One-dose COVID-19 vaccine group | Overall | 0.56 | ( | 0.47 | , | 0.68 | ) | <0.001 |
| Two-dose COVID-19 vaccine group | 14 days–1 month | 0.15 | ( | 0.11 | , | 0.23 | ) | <0.001 |
|  | 1 month–2 months | 0.14 | ( | 0.11 | , | 0.18 | ) | <0.001 |
|  | 2 months–3 months | 0.30 | ( | 0.24 | , | 0.37 | ) | <0.001 |
|  | 3 months–4 months | 1.05 | ( | 0.91 | , | 1.22 | ) | 0.50 |
|  | 4 months–5 months | 1.22 | ( | 1.08 | , | 1.38 | ) | 0.001 |
|  | 5 months–6 months | 1.08 | ( | 0.96 | , | 1.21 | ) | 0.18 |
|  | 6 months–7 months | 0.84 | ( | 0.76 | , | 0.93 | ) | 0.001 |
|  | 7 months–8 months | 0.54 | ( | 0.49 | , | 0.60 | ) | <.001 |
|  | 8 months–9 months | 0.77 | ( | 0.67 | , | 0.88 | ) | <0.001 |
|  | 9 months–10 months | 1.22 | ( | 1.06 | , | 1.40 | ) | 0.005 |
|  | 10 months–11 months | 1.22 | ( | 1.06 | , | 1.41 | ) | 0.006 |
|  | 11 months–12 months | 1.19 | ( | 1.00 | , | 1.40 | ) | 0.048 |
|  | ≥12 months | 0.78 | ( | 0.70 | , | 0.87 | ) | <0.001 |
| Three-dose Covid-19 vaccine group | 14 days–1 month | 0.21 | ( | 0.17 | , | 0.25 | ) | <0.001 |
|  | 1 month–2 months | 0.29 | ( | 0.25 | , | 0.33 | ) | <0.001 |
|  | 2 months–3 months | 0.45 | ( | 0.39 | , | 0.51 | ) | <0.001 |
|  | 3 months–4 months | 0.56 | ( | 0.50 | , | 0.64 | ) | <0.001 |
|  | 4 months–5 months | 0.67 | ( | 0.61 | , | 0.74 | ) | <0.001 |
|  | 5 months–6 months | 0.75 | ( | 0.70 | , | 0.81 | ) | <0.001 |
|  | 6 months–7 months | 0.91 | ( | 0.82 | , | 1.00 | ) | 0.049 |
|  | 7 months–8 months | 0.99 | ( | 0.85 | , | 1.15 | ) | 0.85 |
|  | 8 months–9 months | 0.93 | ( | 0.79 | , | 1.11 | ) | 0.42 |
|  | 9 months–10 months | 0.89 | ( | 0.73 | , | 1.07 | ) | 0.21 |
|  | 10 months–11 months | 0.80 | ( | 0.60 | , | 1.07 | ) | 0.13 |
|  | 11 months–12 months | 0.83 | ( | 0.34 | , | 2.00 | ) | 0.68 |
|  | ≥12 months | - | ( | - | , | - | ) | - |
| Four-dose COVID-19 vaccine group | 14 days–1 month | 0.46 | ( | 0.41 | , | 0.52 | ) | <0.001 |
|  | 1 month–2 months | 0.54 | ( | 0.49 | , | 0.59 | ) | <0.001 |
|  | 2 months–3 months | 0.62 | ( | 0.55 | , | 0.69 | ) | <0.001 |
|  | 3 months–4 months | 0.80 | ( | 0.72 | , | 0.89 | ) | <0.001 |
|  | 4 months–5 months | 0.93 | ( | 0.84 | , | 1.03 | ) | 0.14 |
|  | 5 months–6 months | 1.02 | ( | 0.87 | , | 1.20 | ) | 0.79 |
|  | 6 months–7 months | 0.79 | ( | 0.33 | , | 1.91 | ) | 0.60 |
|  | 7 months–8 months | - | ( | - | , | - | ) | - |
|  | 8 months–9 months | - | ( | - | , | - | ) | - |
|  | 9 months–10 months | - | ( | - | , | - | ) | - |
|  | 10 months–11 months | - | ( | - | , | - | ) | - |
|  | 11 months–12 months | - | ( | - | , | - | ) | - |
|  | ≥12 months | - | ( | - | , | - | ) | - |
| Five-dose COVID-19 vaccine group | 14 days–1 month | 0.52 | ( | 0.44 | , | 0.62 | ) | <0.001 |
|  | 1 month–2 months | 0.52 | ( | 0.41 | , | 0.66 | ) | <0.001 |
|  | 2 months–3 months | - | ( | - | , | - | ) | - |
|  | 3 months–4 months | - | ( | - | , | - | ) | - |
|  | 4 months–5 months | - | ( | - | , | - | ) | - |
|  | 5 months–6 months | - | ( | - | , | - | ) | - |
|  | 6 months–7 months | - | ( | - | , | - | ) | - |
|  | 7 months–8 months | - | ( | - | , | - | ) | - |
|  | 8 months–9 months | - | ( | - | , | - | ) | - |
|  | 9 months–10 months | - | ( | - | , | - | ) | - |
|  | 10 months–11 months | - | ( | - | , | - | ) | - |
|  | 11 months–12 months | - | ( | - | , | - | ) | - |
|  | ≥12 months | - | ( | - | , | - | ) | - |
