# Supplementary material for: Duration of effectiveness of the COVID-19 vaccine in Japan: A retrospective cohort study using large- scale population-based registry data
Source: Research Square preprint supplement (doi:10.21203/rs.3.rs-4023571/v1), 2024-03-19
Supplement: Supplementary file 2 [file eb6bc5819e4d8ef066a055f9.docx]

**Supplemental Table 2.** Time-dependent effectiveness of the vaccine against hospitalization for COVID-19 based on time-dependent piecewise univariable Cox regression analysis

|  |  | Hazard ratio | 95% confidence interval | | | | | P value |
| --- | --- | --- | --- | --- | --- | --- | --- | --- |
| One-dose COVID-19 vaccine group | Overall | 0.46 | ( | 0.24 | , | 0.86 | ) | 0.015 |
| Two-dose COVID-19 vaccine group | 14 days–1 month | - | ( | - | , | - | ) | 0.94 |
|  | 1 month–2 months | 0.14 | ( | 0.06 | , | 0.35 | ) | <0.001 |
|  | 2 months–3 months | 0.22 | ( | 0.10 | , | 0.48 | ) | <0.001 |
|  | 3 months–4 months | 0.26 | ( | 0.12 | , | 0.58 | ) | <0.001 |
|  | 4 months–5 months | 0.42 | ( | 0.22 | , | 0.80 | ) | 0.008 |
|  | 5 months–6 months | 0.38 | ( | 0.20 | , | 0.71 | ) | 0.002 |
|  | 6 months–7 months | 0.82 | ( | 0.57 | , | 1.17 | ) | 0.27 |
|  | 7 months–8 months | 0.67 | ( | 0.46 | , | 0.95 | ) | 0.026 |
|  | 8 months–9 months | 0.99 | ( | 0.60 | , | 1.62 | ) | 0.95 |
|  | 9 months–10 months | 0.40 | ( | 0.13 | , | 1.26 | ) | 0.12 |
|  | 10 months–11 months | - | ( | - | , | - | ) | 0.95 |
|  | 11 months–12 months | 0.47 | ( | 0.11 | , | 1.92 | ) | 0.29 |
|  | ≥12 months | 1.59 | ( | 0.90 | , | 2.81 | ) | 0.11 |
| Three-dose COVID-19 vaccine group | 14 days–1 month | 0.10 | ( | 0.04 | , | 0.26 | ) | <0.001 |
|  | 1 month–2 months | 0.42 | ( | 0.26 | , | 0.68 | ) | <0.001 |
|  | 2 months–3 months | 0.46 | ( | 0.26 | , | 0.81 | ) | 0.007 |
|  | 3 months–4 months | 0.56 | ( | 0.31 | , | 1.00 | ) | 0.051 |
|  | 4 months–5 months | 0.85 | ( | 0.52 | , | 1.37 | ) | 0.5 |
|  | 5 months–6 months | 0.88 | ( | 0.58 | , | 1.35 | ) | 0.57 |
|  | 6 months–7 months | 2.09 | ( | 1.33 | , | 3.27 | ) | 0.001 |
|  | 7 months–8 months | 1.40 | ( | 0.59 | , | 3.35 | ) | 0.45 |
|  | 8 months–9 months | 1.52 | ( | 0.45 | , | 5.15 | ) | 0.5 |
|  | 9 months–10 months | 0.95 | ( | 0.13 | , | 7.28 | ) | 0.96 |
|  | 10 months–11 months | 6.13 | ( | 1.30 | , | 28.99 | ) | 0.022 |
|  | 11 months–12 months | - | ( | - | , | - | ) | 1.00 |
|  | ≥12 months | - | ( | - | , | - | ) | 1.00 |
| Four-dose COVID-19 vaccine group | 14 days–1 month | 0.33 | ( | 0.15 | , | 0.73 | ) | 0.006 |
|  | 1 month–2 months | 0.46 | ( | 0.25 | , | 0.85 | ) | 0.013 |
|  | 2 months–3 months | 0.85 | ( | 0.43 | , | 1.65 | ) | 0.62 |
|  | 3 months–4 months | 0.73 | ( | 0.29 | , | 1.83 | ) | 0.50 |
|  | 4 months–5 months | 1.79 | ( | 0.77 | , | 4.17 | ) | 0.18 |
|  | 5 months–6 months | - | ( | - | , | - | ) | - |
|  | 6 months–7 months | - | ( | - | , | - | ) | - |
|  | 7 months–8 months | - | ( | - | , | - | ) | - |
|  | 8 months–9 months | - | ( | - | , | - | ) | - |
|  | 9 months–10 months | - | ( | - | , | - | ) | - |
|  | 10 months–11 months | - | ( | - | , | - | ) | - |
|  | 11 months–12 months | - | ( | - | , | - | ) | - |
|  | ≥12 months | - | ( | - | , | - | ) | - |
| Five-dose COVID-19 vaccine group | 14 days–1 month | - | ( | - | , | - | ) | - |
|  | 1 month–2 months | 1.48 | ( | 0.17 | , | 13.11 | ) | 0.72 |
|  | 2 months–3 months | - | ( | - | , | - | ) | - |
|  | 3 months–4 months | - | ( | - | , | - | ) | - |
|  | 4 months–5 months | - | ( | - | , | - | ) | - |
|  | 5 months–6 months | - | ( | - | , | - | ) | - |
|  | 6 months–7 months | - | ( | - | , | - | ) | - |
|  | 7 months–8 months | - | ( | - | , | - | ) | - |
|  | 8 months–9 months | - | ( | - | , | - | ) | - |
|  | 9 months–10 months | - | ( | - | , | - | ) | - |
|  | 10 months–11 months | - | ( | - | , | - | ) | - |
|  | 11 months–12 months | - | ( | - | , | - | ) | - |
|  | ≥12 months | - | ( | - | , | - | ) | - |
